# Supplementary material for: Impact of COVID-19 lockdown on particulate matter oxidative potential at urban background versus traffic sites
Source: Royal Society of Chemistry journal article supplement (doi:10.1039/d3ea00013c), 2023-01-01
Supplement: d3ea00013c1.pdf [file d3ea00013c1.pdf]

## Impact of COVID-19 lockdown on particulate matter oxidative potential at urban background versus traffic sites

### Supplementary information

#### S1. Overview of measurements

**Table S1: Overview of measurements available for the GRE and BERN sites.**

| Study area | Site type        | PM size fraction  | Variable          | Number of observations | Sampling period          |
|------------|------------------|-------------------|-------------------|------------------------|--------------------------|
| Grenoble   | Urban background | PM <sub>10</sub>  | PM <sub>10</sub>  | 2001                   | 23/01/2008 to 24/04/2022 |
|            |                  |                   | OC                | 2011                   | 23/01/2008 to 24/04/2022 |
|            |                  |                   | EC                | 2010                   | 23/01/2008 to 24/04/2022 |
|            |                  |                   | BC <sub>tot</sub> | 1051                   | 02/12/2014 to 30/03/2021 |
|            |                  |                   | BC <sub>wb</sub>  | 1051                   | 02/12/2014 to 30/03/2021 |
|            |                  |                   | BC <sub>ff</sub>  | 1051                   | 02/12/2014 to 30/03/2021 |
|            |                  |                   | OP <sub>AA</sub>  | 1249                   | 02/01/2013 to 24/01/2022 |
|            |                  |                   | OP <sub>DTT</sub> | 1249                   | 02/01/2013 to 24/01/2022 |
| Bern       | Traffic          | PM <sub>10</sub>  | PM <sub>10</sub>  | 6837                   | 01/01/2000 to 31/12/2021 |
|            |                  |                   | OP <sub>AA</sub>  | 273                    | 07/06/2018 to 31/12/2020 |
|            |                  |                   | OP <sub>DTT</sub> | 273                    | 07/06/2018 to 31/12/2020 |
| Bern       | Traffic          | PM <sub>2.5</sub> | PM <sub>2.5</sub> | 6885                   | 01/01/2000 to 31/12/2021 |
|            |                  |                   | BC <sub>tot</sub> | 2515                   | 01/01/2015 to 31/12/2021 |
|            |                  |                   | BC <sub>wb</sub>  | 2441                   | 01/01/2015 to 31/12/2021 |
|            |                  |                   | BC <sub>ff</sub>  | 2441                   | 01/01/2015 to 31/12/2021 |
|            |                  |                   | OP <sub>AA</sub>  | 177                    | 07/06/2018 to 29/12/2020 |
|            |                  |                   | OP <sub>DTT</sub> | 177                    | 07/06/2018 to 29/12/2020 |

## S2. Feature importance scores for the Random Forest (RF) model

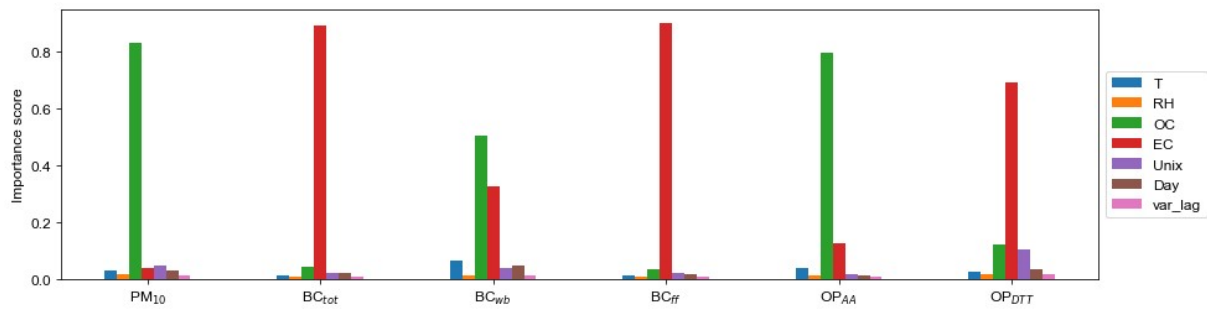

Figure S1: Feature importance score for the RF models performed on each target variable in the GRE site.

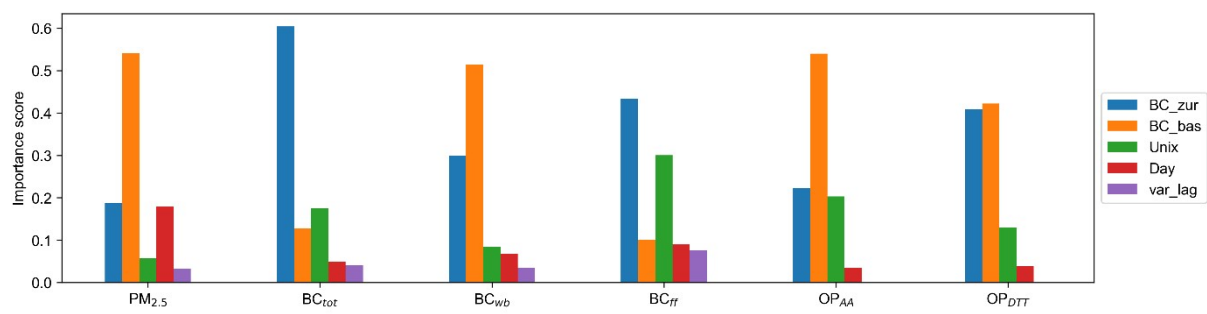

Figure S2: Feature importance score for the RF models performed on each target variable in the BERN (PM<sub>2.5</sub>) site.

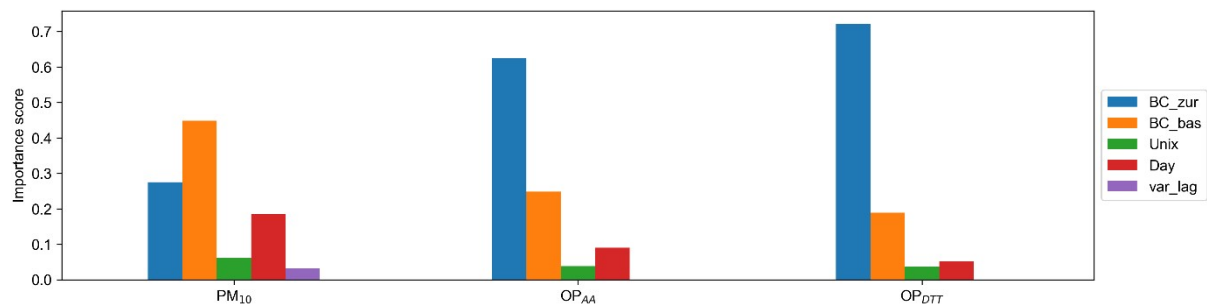

Figure S3: Feature importance score for the RF models performed on each target variable in the BERN (PM<sub>10</sub>) site.

### S3. Comparison of the Random Forest (RF) model performance between the training and testing sets

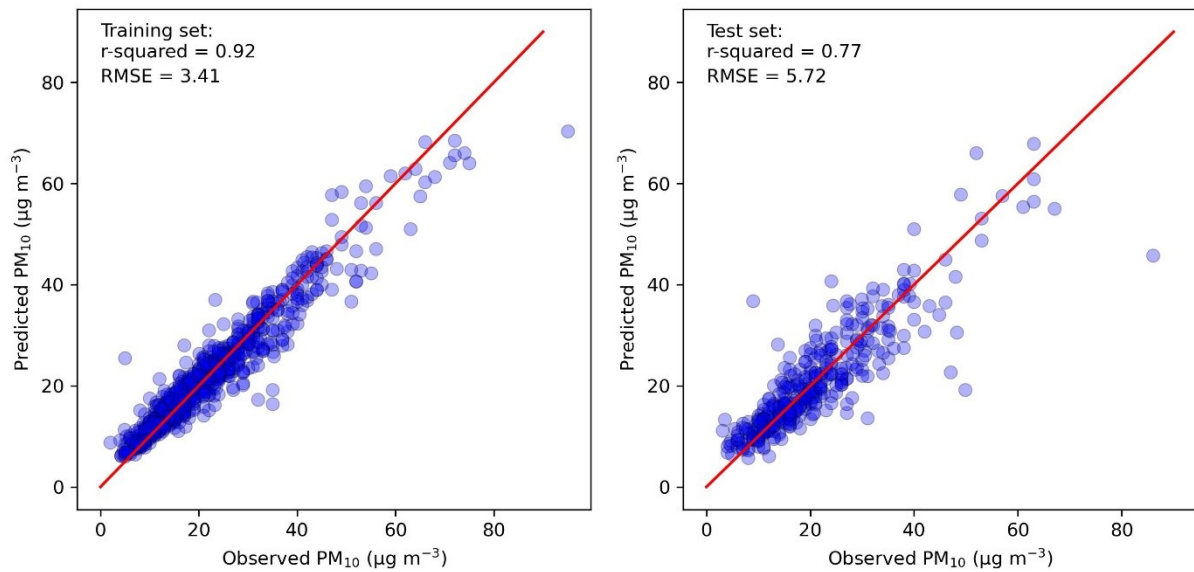

**Figure S4:** Comparison between the observed and RF- predicted PM<sub>10</sub> mass concentration (μg m<sup>-3</sup>) for the training and testing sets in the GRE site. Note: Red line represents the one-to-one line.

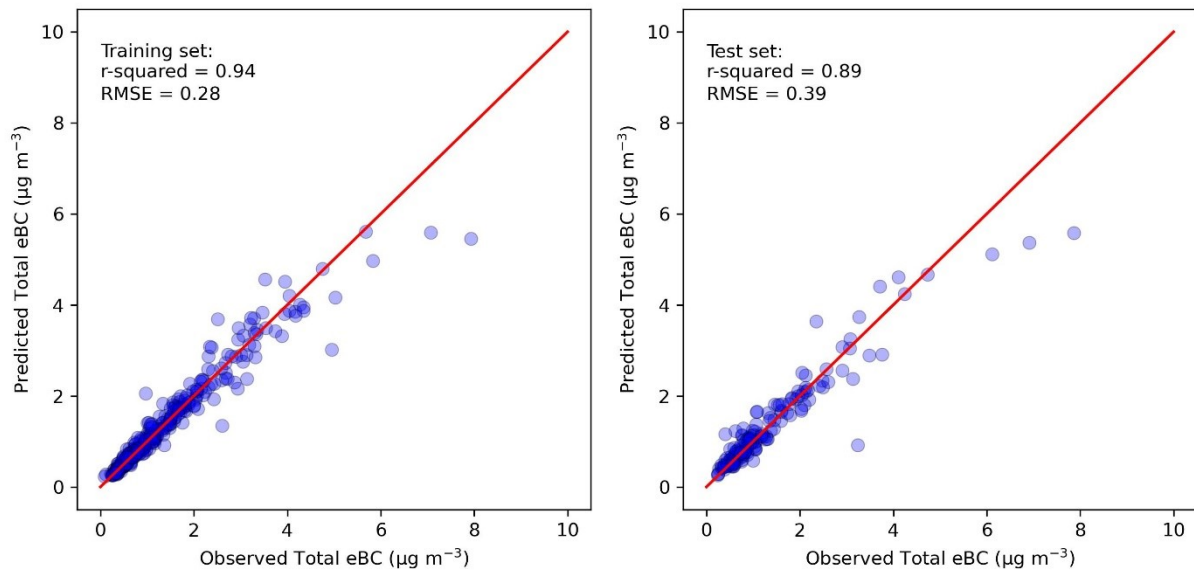

**Figure S5:** Comparison between the observed and RF- predicted total black carbon (BC<sub>10</sub>) mass concentration (μg m<sup>-3</sup>) for the training and testing sets in the GRE site. Note: Red line represents the one-to-one line.

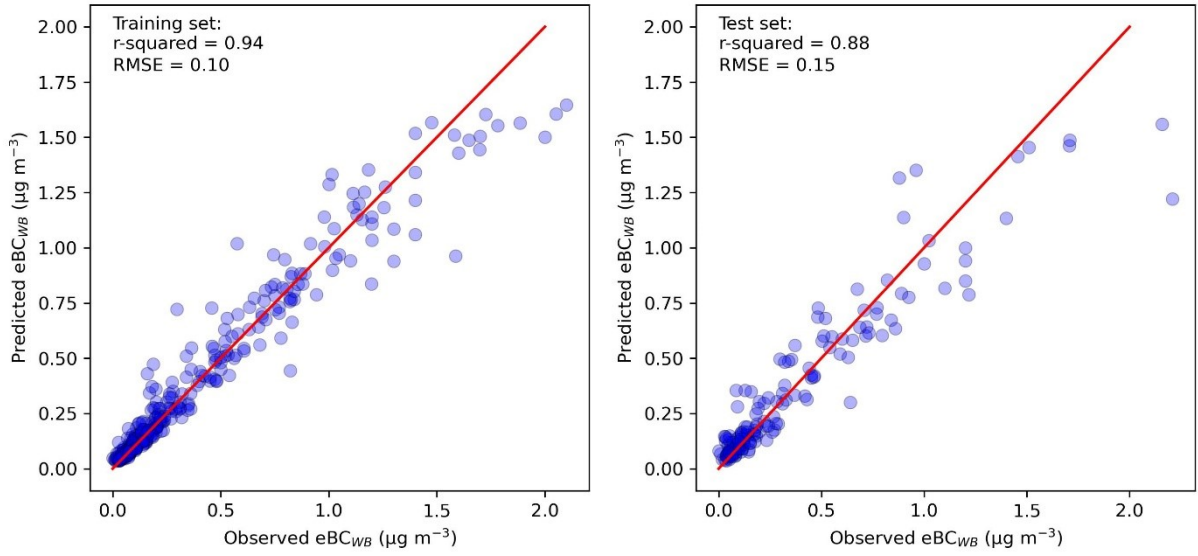

**Figure S6: Comparison between the observed and RF- predicted wood burning black carbon (BC<sub>wb</sub>) mass concentration (µg m<sup>-3</sup>) for the training and testing sets in the GRE site. Note: Red line represents the one-to-one line.**

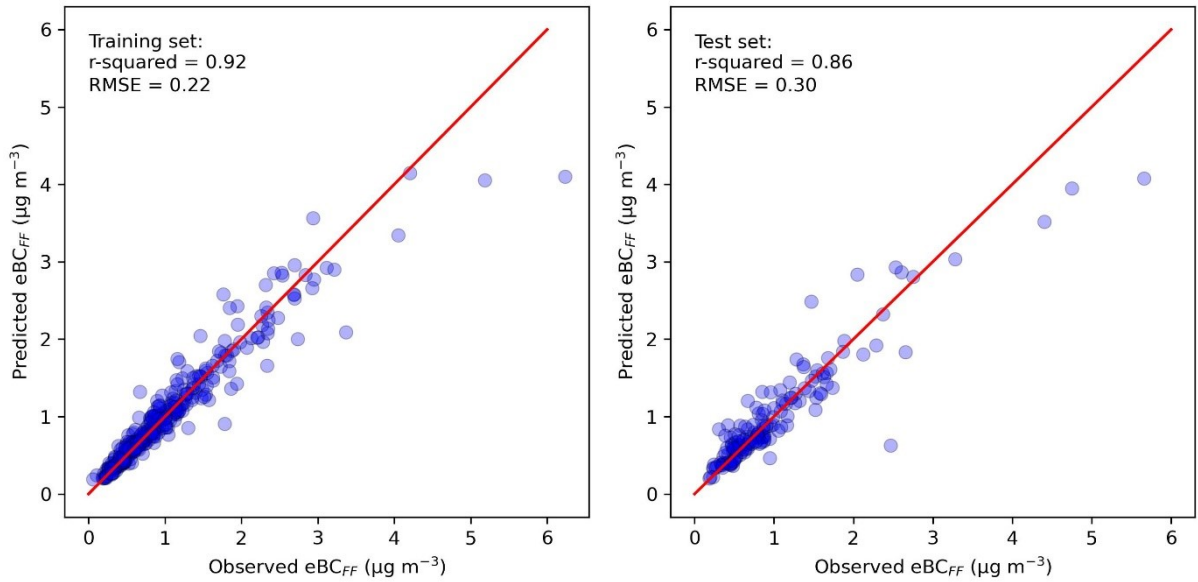

**Figure S7: Comparison between the observed and RF- predicted fossil fuels black carbon (BC<sub>ff</sub>) mass concentration (µg m<sup>-3</sup>) for the training and testing sets in the GRE site. Note: Red line represents the one-to-one line.**

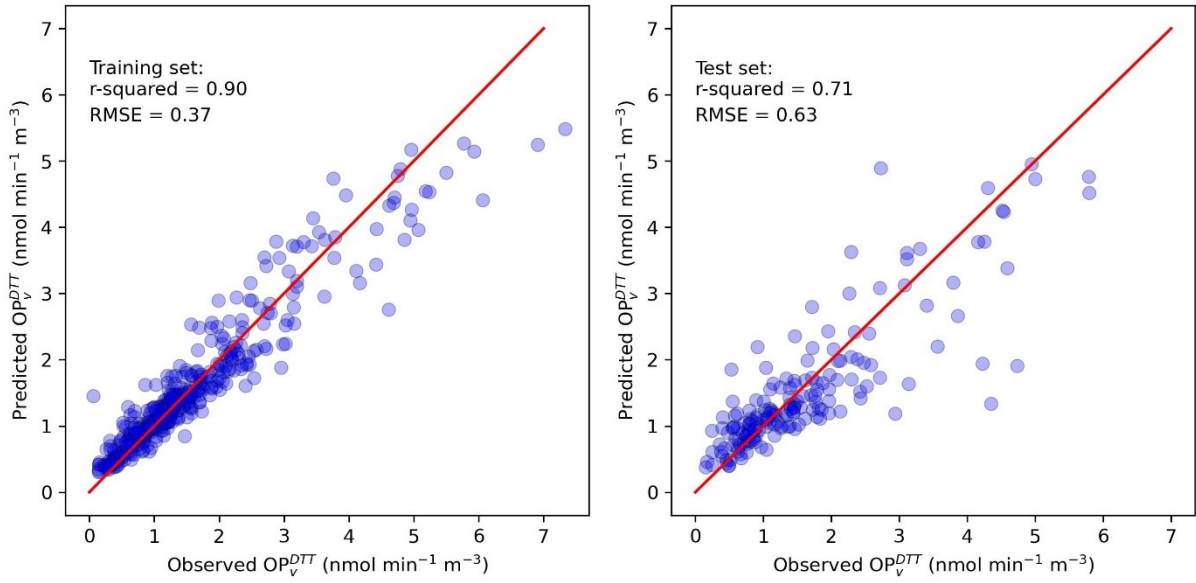

**Figure S8:** Comparison between the observed and RF- predicted  $OP_{DTT}$  ( $\text{nmol min}^{-1} \text{m}^{-3}$ ) of  $PM_{10}$  for the training and testing sets in the GRE site. Note: Red line represents the one-to-one line.

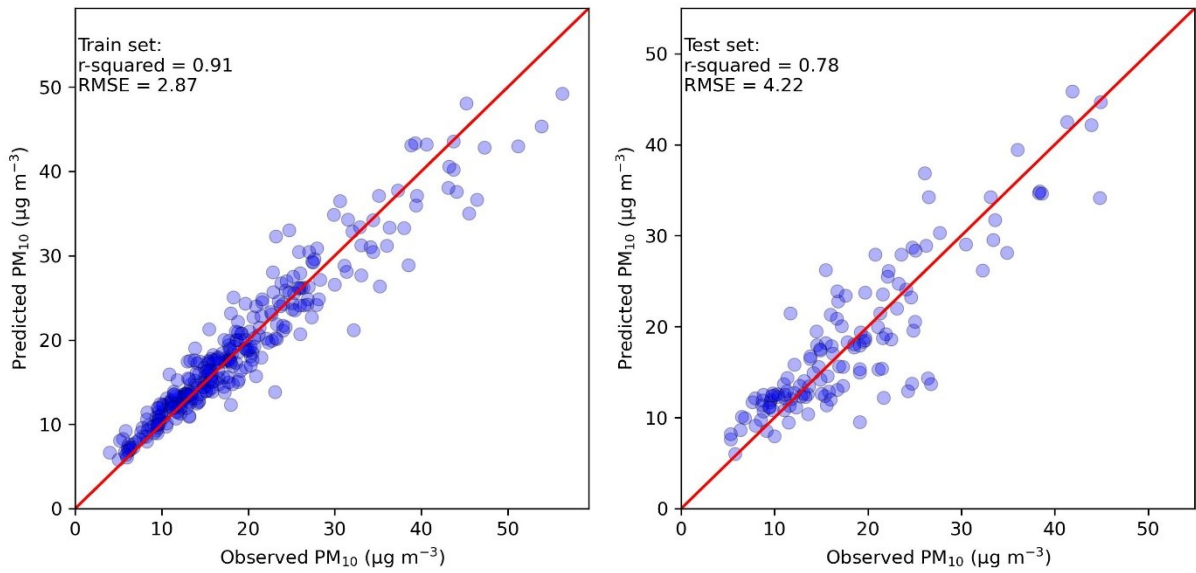

**Figure S9:** Comparison between the observed and RF- predicted  $PM_{10}$  mass concentration ( $\mu\text{g m}^{-3}$ ) for the training and testing sets in the BERN site. Note: Red line represents the one-to-one line.

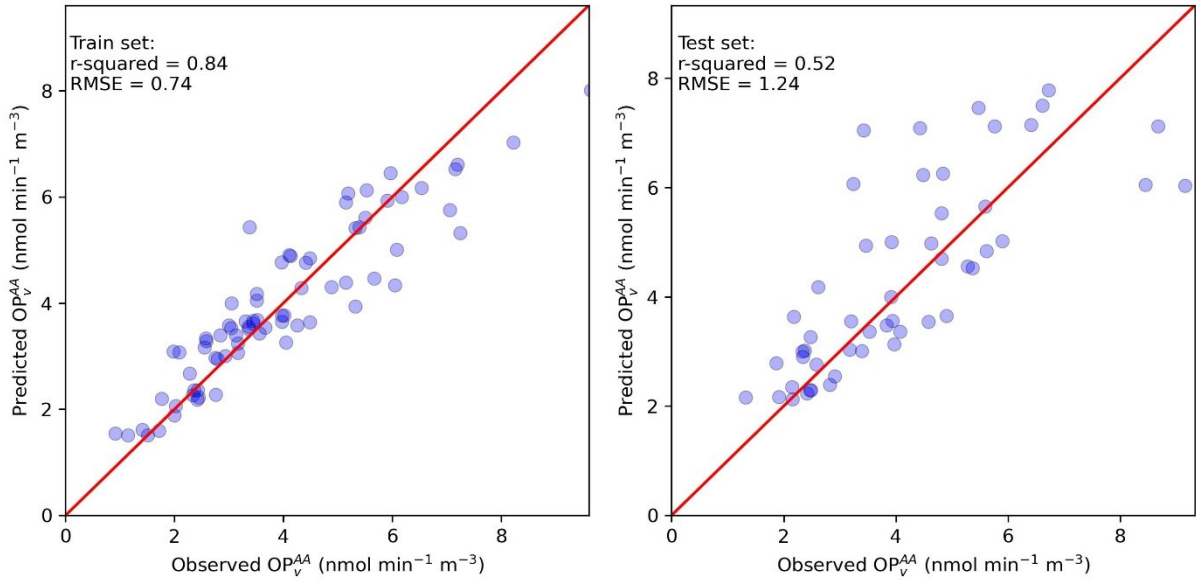

**Figure S10: Comparison between the observed and RF- predicted  $OP_{AA}$  (nmol min<sup>-1</sup> m<sup>-3</sup>) of PM<sub>10</sub> for the training and testing sets in the BERN site. Note: Red line represents the one-to-one line.**

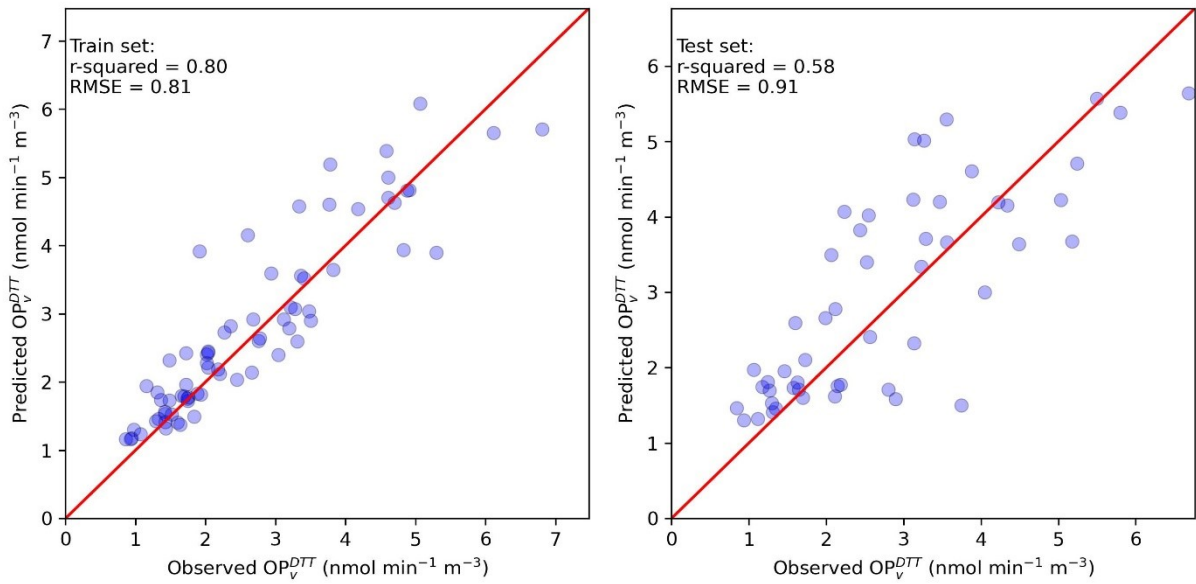

**Figure S11: Comparison between the observed and RF- predicted  $OP_{DTT}$  (nmol min<sup>-1</sup> m<sup>-3</sup>) of PM<sub>10</sub> for the training and testing sets in the BERN site. Note: Red line represents the one-to-one line.**

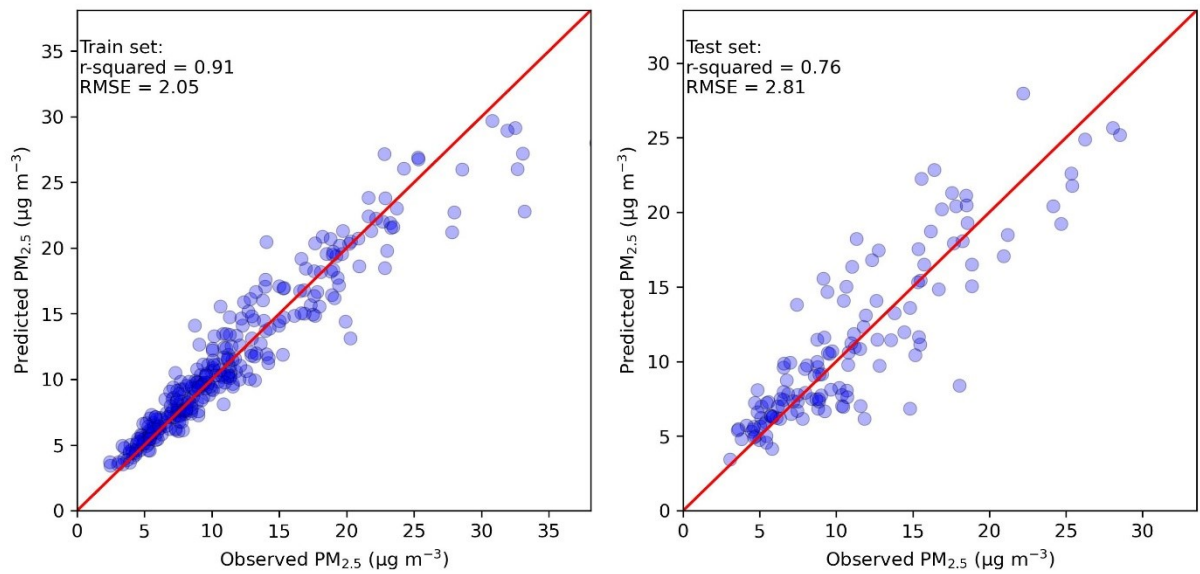

**Figure S12: Comparison between the observed and RF- predicted PM<sub>2.5</sub> mass concentration (μg m<sup>-3</sup>) for the training and testing sets in the BERN site. Note: Red line represents the one-to-one line.**

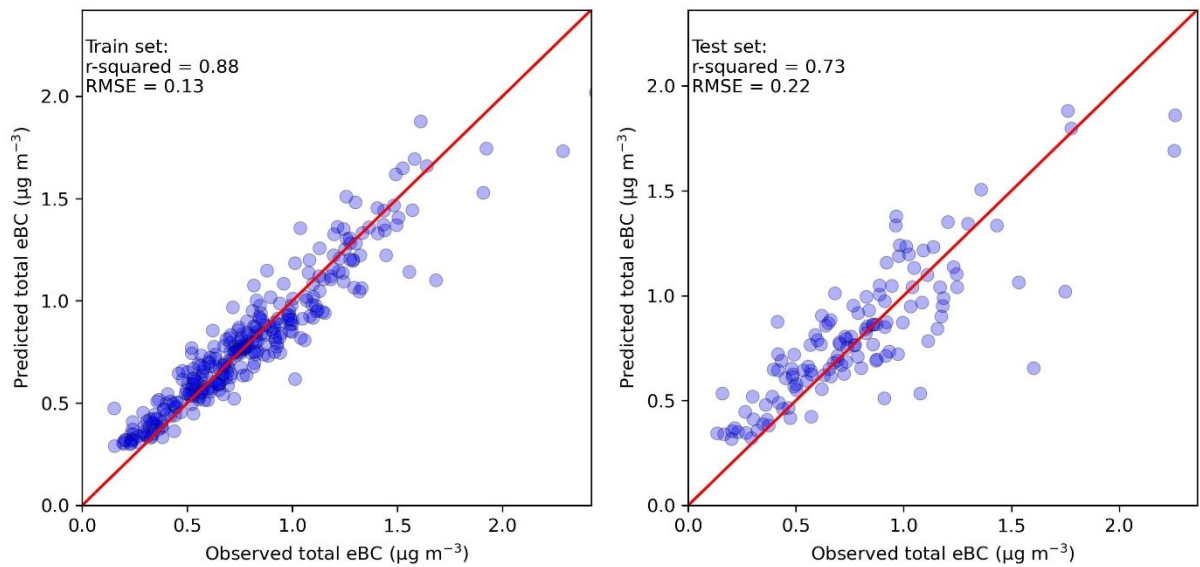

**Figure S13: Comparison between the observed and RF- predicted total black carbon (BC<sub>tot</sub>) mass concentration (μg m<sup>-3</sup>) for the training and testing sets in the BERN site. Note: Red line represents the one-to-one line.**

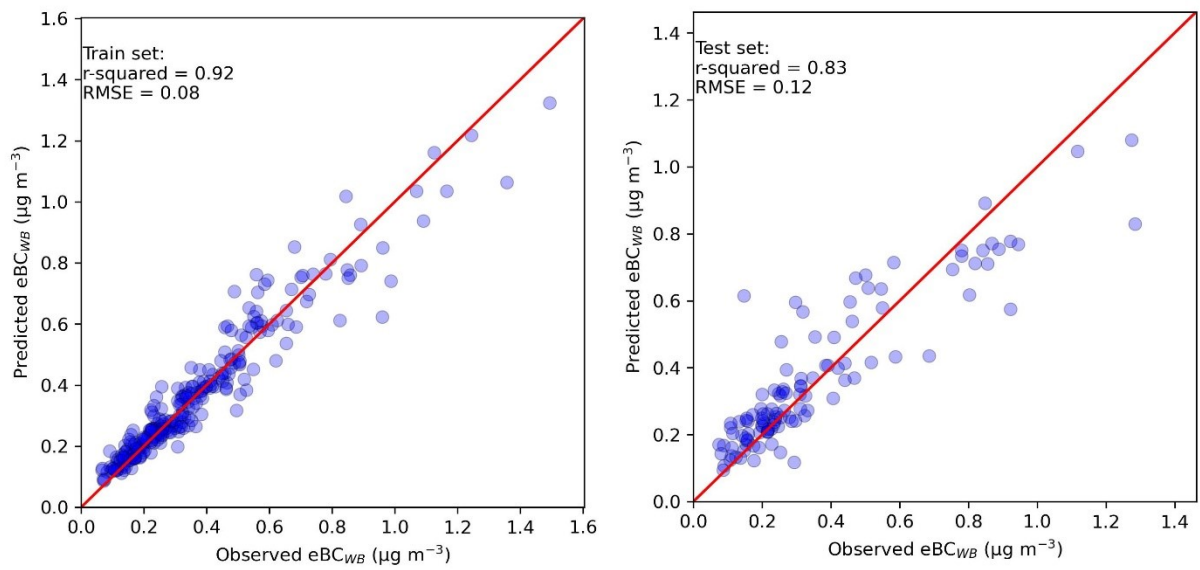

**Figure S14: Comparison between the observed and RF-predicted wood burning black carbon ( $BC_{wb}$ ) mass concentration ( $\mu\text{g m}^{-3}$ ) for the training and testing sets in the BERN site. Note: Red line represents the one-to-one line.**

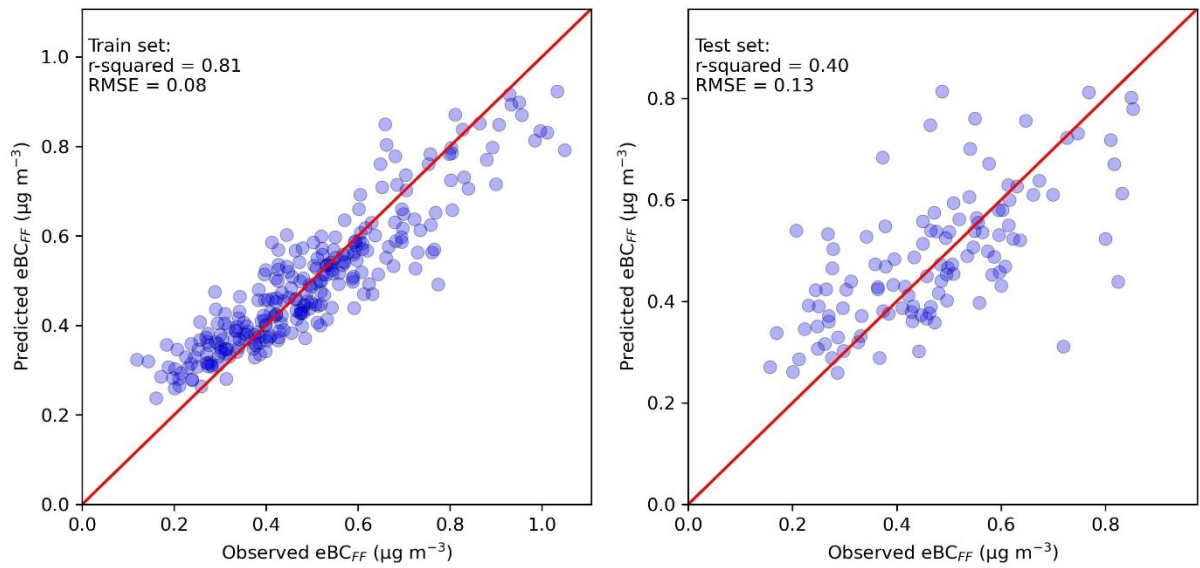

**Figure S15: Comparison between the observed and RF-predicted fossil fuels black carbon ( $BC_{ff}$ ) mass concentration ( $\mu\text{g m}^{-3}$ ) for the training and testing sets in the BERN site. Note: Red line represents the one-to-one line.**



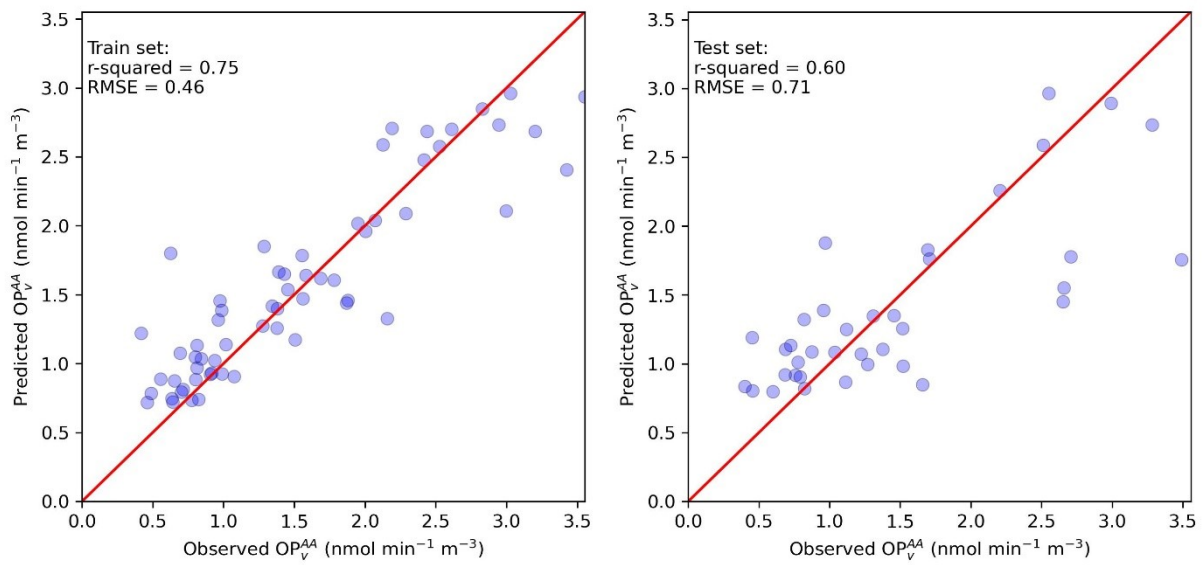

**Figure S16: Comparison between the observed and RF- predicted  $OP_{AA}$  ( $\text{nmol min}^{-1} \text{m}^{-3}$ ) of  $PM_{2.5}$  for the training and testing sets in the BERN site. Note: Red line represents the one-to-one line.**

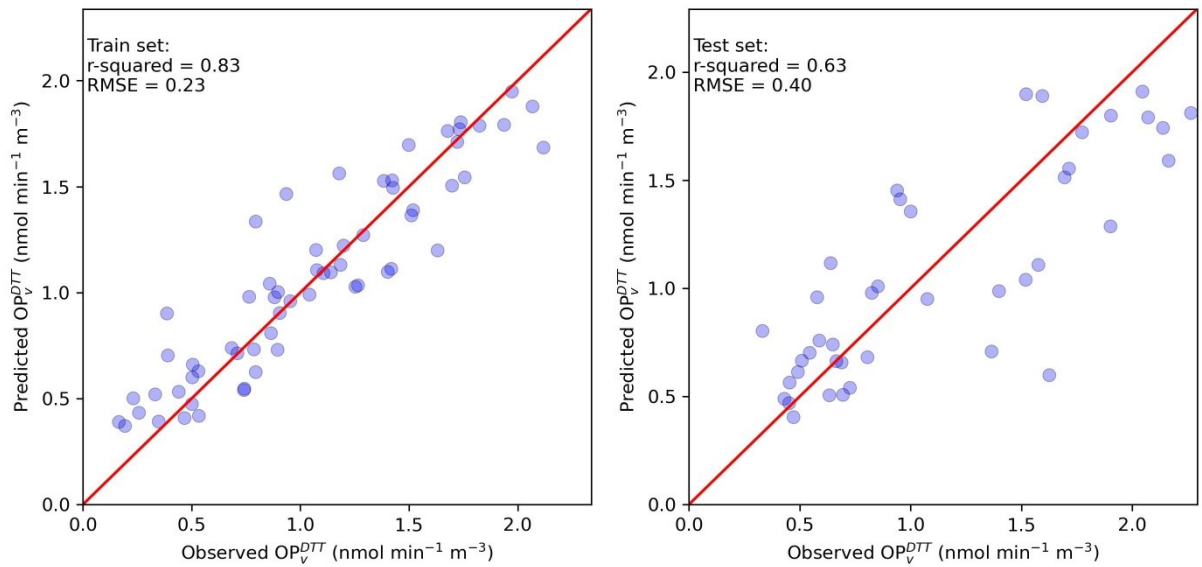

**Figure S17: Comparison between the observed and RF- predicted  $OP_{DTT}$  ( $\text{nmol min}^{-1} \text{m}^{-3}$ ) of  $PM_{2.5}$  for the training and testing sets in the BERN site. Note: Red line represents the one-to-one line.**

### S3. Supplementary figures

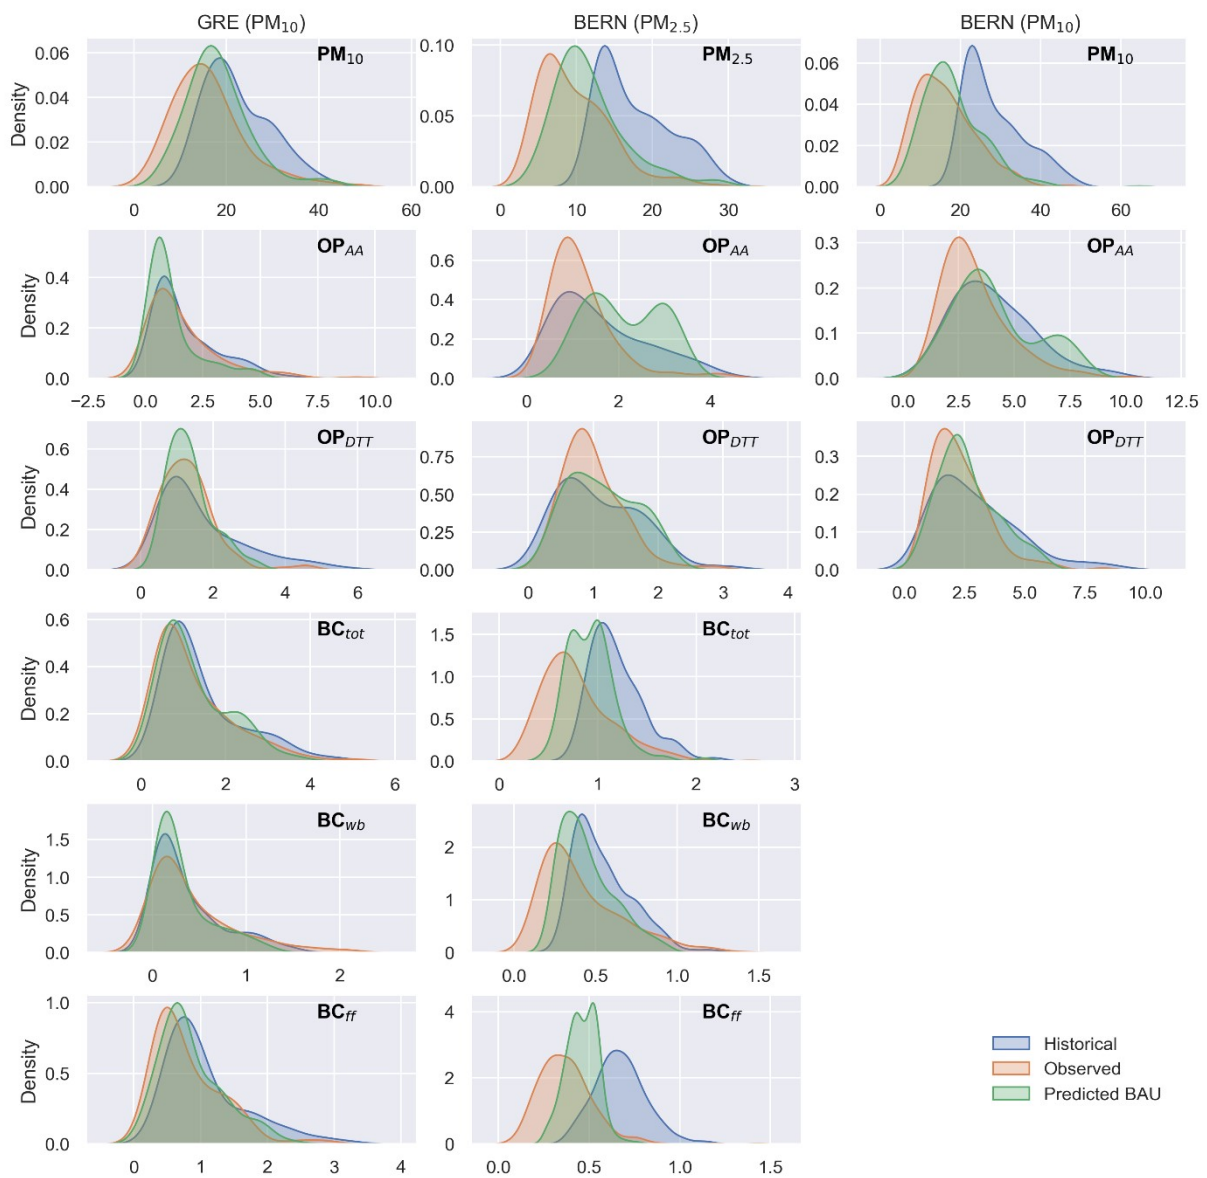

**Figure S18: Probability density plot between target variables (PM<sub>10</sub>, BC<sub>tot</sub>, BC<sub>wb</sub>, BC<sub>ff</sub>, OP<sub>AA</sub>, and OP<sub>DTT</sub>) in each site during the COVID-19 lockdown period. Blue curves represent historical levels prior to year 2020, the orange curves represent the observed levels during 2020, and green curves represent the RF-predicted business-as-usual (BAU) levels during 2020. Note: Each x-axis depicts the unit of each target variable:  $\mu\text{g m}^{-3}$  for PM<sub>10</sub>, BC<sub>tot</sub>, BC<sub>wb</sub>, and BC<sub>ff</sub>, while  $\text{nmol min}^{-1} \text{m}^{-3}$  for OP<sub>AA</sub> and OP<sub>DTT</sub>.**

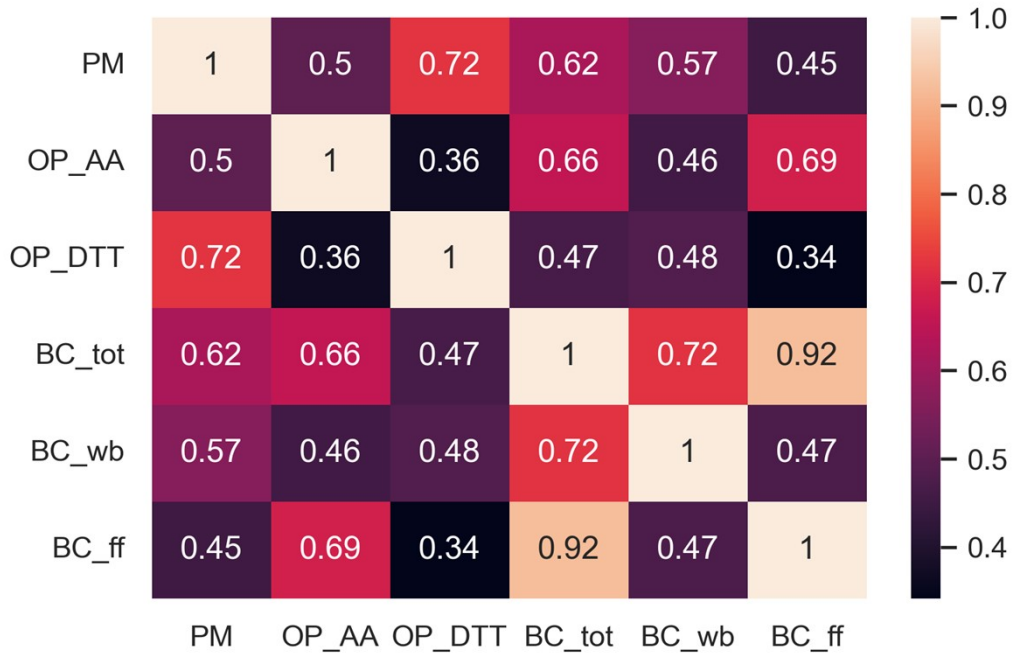

Figure S19: Heatmap of the associations of all variables in the PM<sub>10</sub> fraction using Pearson correlation in the GRE site.

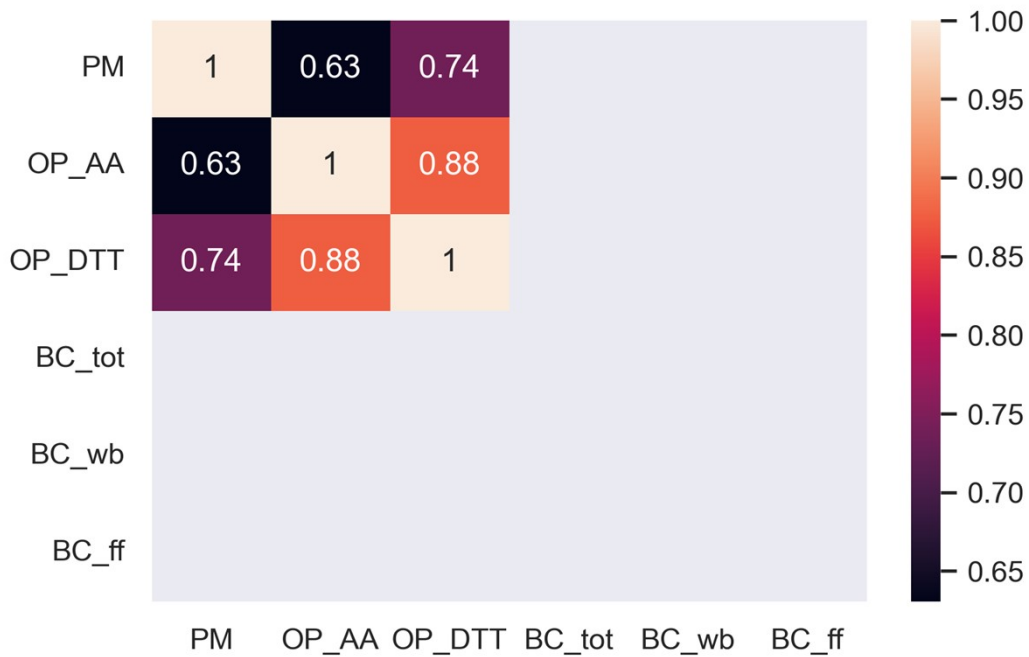

Figure S20: Heatmap of the associations of all variables in the PM<sub>10</sub> fraction using Pearson correlation in the BERN site.

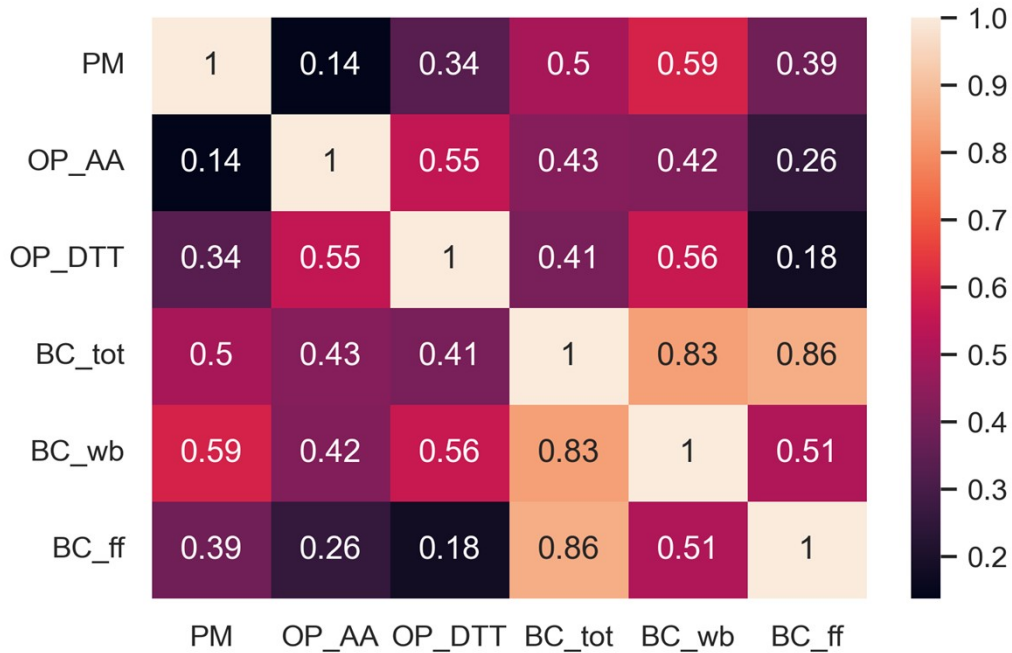

Figure S21: Heatmap of the associations of all variables in the  $PM_{2.5}$  fraction using Pearson correlation in the BERN site.

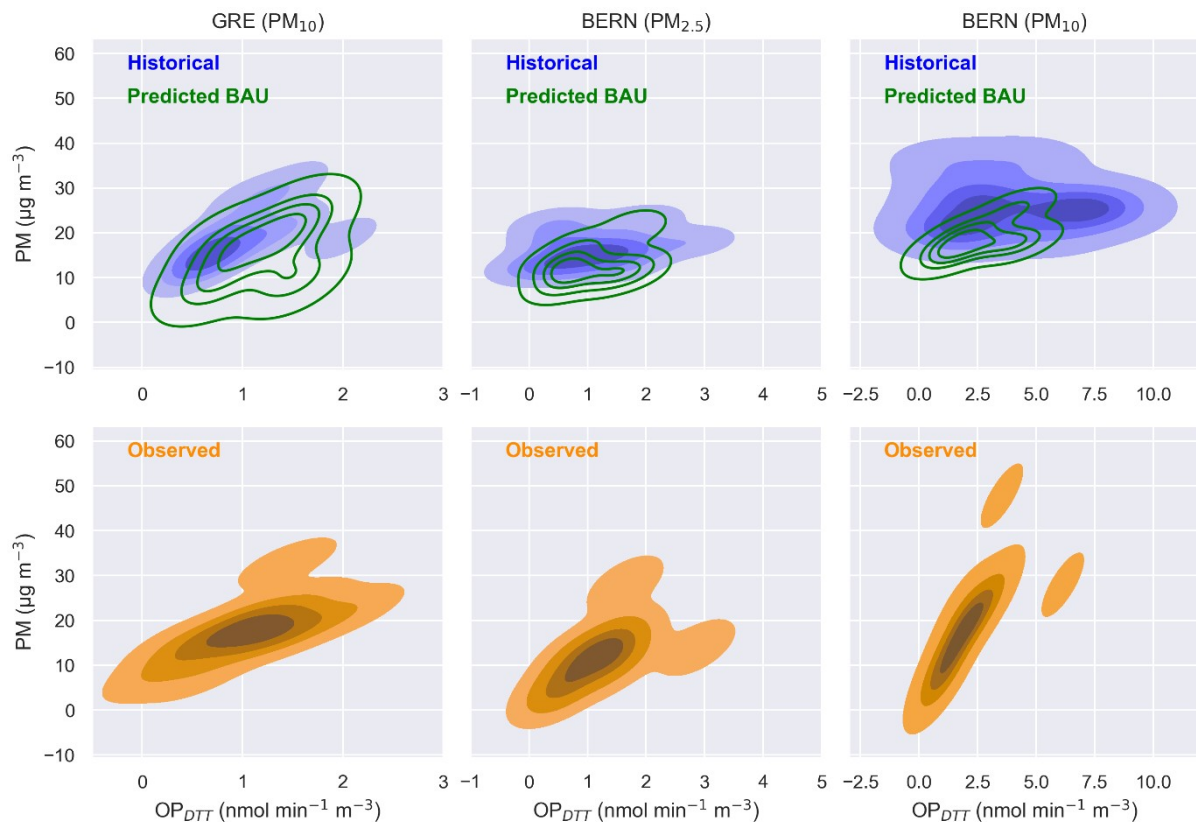

Figure S22: Bivariate distribution between  $PM$  and  $OP_{AA}$  in each site during the COVID-19 lockdown period using a kernel density function (KDF). Blue plots represent historical levels prior to year 2020, the orange plots represent the observed levels during 2020, and green plots represent the RF-predicted business-as-usual (BAU) levels during 2020. Note: The default number of contours was set to 5 levels. These contours were drawn at *iso*-proportions of the density plot representing the distributions of both variables.
